1 **The antioxidant drug N-acetylcysteine abolishes SOS-mediated mutagenesis produced**  
2 **by fluoroquinolones in bacteria**

3 Ana I. Rodríguez-Rosado<sup>1§</sup>, Estela Ynés Valencia<sup>2§</sup>, Alexandro Rodríguez-Rojas<sup>3</sup>, Coloma  
4 Costas<sup>1</sup>, Rodrigo S. Galhardo<sup>2</sup>, Jesús Blázquez<sup>4\*</sup> and Jerónimo Rodríguez-Beltrán<sup>1,B\*</sup>

5 **Author affiliations**

6 1. Instituto de Biomedicina de Sevilla (IBiS), Seville, Spain.

7 2. Department of Microbiology, Institute of Biomedical Sciences, University of São Paulo,  
8 São Paulo, Brazil.

9 3. Institute of Biology, Freie Universität Berlin, Berlin, Germany.

10 4. Centro Nacional de Biotecnología (CNB), Madrid, Spain.

11 B. Present address: Instituto Ramón y Cajal de Investigación Sanitaria (IRYCIS). Hospital  
12 Universitario Ramón y Cajal, Madrid, Spain.

13 § These authors contributed equally to this work.

14 **\*Address correspondence to:**

15 Jesús Blázquez

16 Centro Nacional de Biotecnología (CNB), Madrid, Spain.

17 [blazquez@cnb.csic.es](mailto:blazquez@cnb.csic.es)

18 Jerónimo Rodríguez-Beltrán

19 Instituto de Biomedicina de Sevilla (IBiS), Seville, Spain.

20 [jeronimo.rodriguez.beltran@gmail.com](mailto:jeronimo.rodriguez.beltran@gmail.com)

## 21 **Abstract**

22 Certain antibiotics, particularly fluoroquinolones, induce the mutagenic SOS response and  
23 increase the levels of intracellular reactive oxygen species (ROS), which have been  
24 associated with antibiotic lethality. Both SOS and ROS promote bacterial mutagenesis,  
25 fueling the emergence of resistant mutants during antibiotic treatments. However, the  
26 relative contribution of ROS and SOS on this antibiotic-mediated mutagenesis is currently  
27 unknown. We used the antioxidant molecule N-acetylcysteine (NAC) to study the  
28 contribution of ROS on the SOS response and the mutagenesis mediated by the  
29 fluoroquinolone antibiotic ciprofloxacin (CIP). We show that NAC is able to reduce  
30 intracellular ROS levels, as well as the SOS response caused by treatment with  
31 subinhibitory concentrations of CIP, without affecting its anti-bacterial activity. This effect  
32 reduces antibiotic-induced mutagenesis to levels comparable to a translesion synthesis  
33 DNA-polymerases deficient strain, suggesting that ROS play a major role in SOS-induced  
34 mutagenesis. Collectively, our results shed light on the mechanisms underlying antibiotic-  
35 induced mutagenesis and open the possibility for the use of NAC as adjuvant in antibiotic  
36 therapy to hinder the development of antibiotic resistance.

## 37 **Importance**

38 The development of antimicrobial resistance, together with the existing paucity in the  
39 antibiotic pipeline, renders every antibiotic into a non-renewable resource that should be  
40 carefully rationed. This worrisome scenario is exacerbated by the fact that treatment with  
41 certain antibiotics, besides killing bacteria, increase the chances of surviving bacteria to  
42 acquire resistance as a side-effect. The mechanisms underlying this phenomenon involve  
43 complex bacterial physiological responses to antibiotics such as induction of the SOS  
44 response and the generation of reactive oxygen species. In this work, we demonstrate that  
45 the antioxidant drug N-acetylcysteine inhibits antibiotic-induced mutagenesis by reducing  
46 the levels of reactive oxygen species and SOS induction in bacterial cells upon antibiotic  
47 treatment. Our results strongly suggest that reactive oxygen species are a key factor in  
48 antibiotic-induced SOS mutagenesis and open the possibility of using NAC combined with  
49 antibiotic therapy to counteract the development of antibiotic resistance.

## 50 Introduction

51 Antibiotics, besides their antimicrobial action, can promote genetic variability in  
52 bacteria as an undesirable side effect (1). In turn, genetic variability increases the chances  
53 for bacteria to acquire resistance and jeopardize the success of antimicrobial therapies.  
54 Blocking the bacterial physiological responses that promote genetic variability is thus  
55 crucial to hinder resistance spread (2, 3).

56 Most of the genetic variability produced by antibiotics has been attributed to the  
57 induction of the SOS response. The SOS response is a coordinated genetic network that  
58 responds to DNA damage. Several antibiotics produce DNA damage and consequently  
59 induce the SOS response. For instance, fluoroquinolones such as ciprofloxacin (CIP) block  
60 DNA gyrase on DNA, which cause the stalling of replication forks and leads to cell death  
61 (4). This produces double strand breaks (DSB) that are processed into single strand DNA,  
62 that together with RecA trigger the SOS response. SOS induction up-regulates the  
63 expression of more than 40 genes whose functions include DNA-damage tolerance and non-  
64 mutagenic DNA repair (5–8). However, when DNA damage is persistent, the error-prone  
65 DNA translesion synthesis (TLS) takes place. In *Escherichia coli*, TLS is accomplished by the  
66 specialized DNA polymerases Pol II, Pol IV and Pol V, encoded respectively by the *polB*,  
67 *dinB* and *umuDC* genes (9). TLS polymerases are able to replicate heavily damaged DNA  
68 but do so at the cost of a reduced fidelity, therefore increasing mutagenesis (5).  
69 Additionally, RecA-mediated recombination is also induced by fluoroquinolone antibiotics  
70 (10). Hence, some antibiotics can promote mutagenesis and recombination (i.e. genetic  
71 instability) by directly inducing DNA damage and, in turn, the SOS response.

72 Bactericidal antibiotics have been shown to produce a perturbation of the  
73 intracellular redox homeostasis. This perturbation is caused by an increased intracellular  
74 respiration rate accompanied by destabilization of the Iron-Sulfur clusters, which leads to

75 production of reactive oxygen species (ROS) via Fenton chemistry (11–13). ROS are highly  
76 reactive chemical species capable of rapidly oxidizing key cellular components, including  
77 proteins, lipids and DNA. ROS have been argued as a common cause of bacterial cell death  
78 for several antibiotic families (12–14), although this notion has been further challenged  
79 (15, 16). Oxidation of DNA by ROS produces a wide variety of lesions that, if not repaired,  
80 are mutagenic and can even cause cell death (17–19).

81 In summary, previous studies have shown that there are at least two routes to  
82 antibiotic-triggered bacterial mutagenesis; SOS-mediated TLS and ROS-induced  
83 mutagenesis. Interestingly, these two routes are probably not independent but highly  
84 intertwined. For instance, oxidation of the nucleotide pool after antibiotic treatment leads  
85 to Pol IV-mediated incorporation of 8-oxo-dGTP into DNA, which creates a mutagenic  
86 lesion (14, 20). Furthermore, ROS are good SOS inducers because they directly damage  
87 DNA (21–23). Hence, SOS-mediated TLS mutagenesis might be fueled by the presence of  
88 oxidative damage in both DNA and the nucleotide pool (24, 25).

89 Recently, there has been growing interest in the development of novel therapies  
90 designed not to kill bacteria, but to inhibit the aforementioned routes to antibiotic  
91 resistance (2, 26, 27). In particular, most studies have focused on developing SOS  
92 inhibitors that target RecA (28–30). RecA offers an appealing target because its inhibition  
93 not only reduces bacterial evolvability, but also renders bacteria more sensitive to several  
94 antibiotics (31); in some cases leading to complete reversion of antibiotic resistance (32).  
95 However, the presence of RecA homologs in mammals in humans suggests LexA as a  
96 potentially safer target (33).

97 In this study, we hypothesized that antioxidant molecules could reduce ROS  
98 produced by antibiotic treatment and consequently inhibit SOS induction. This combined  
99 inhibition might, in turn, reduce antibiotic-induced mutagenesis. To test this idea, we

100 focused on N-acetylcysteine (NAC), a well-known antioxidant that acts as a scavenger of  
101 oxidant species and as a precursor of glutathione synthesis (34, 35). NAC is clinically safe  
102 and is currently used in humans therapy to treat numerous disorders (34). Additionally,  
103 NAC does not negatively affect the activity of major antibiotic classes, with the exception of  
104 carbapenems (36, 37). On the contrary, NAC has shown antimicrobial properties against a  
105 range of clinically-relevant pathogens (38–41). Our results show that, due to its  
106 antioxidant properties, NAC offers an unique opportunity to disentangle the effects of ROS  
107 and SOS in antibiotic-mediated mutagenesis. Additionally, it promises to become a  
108 therapeutic alternative to outsmart the evolution of bacterial resistance.

## 109 **Results**

### 110 *CIP induces mutagenesis at subinhibitory levels*

111 The mutagenic activity of antimicrobials is expected to occur within a window of  
112 concentrations around their minimal inhibitory concentration (MIC), because higher levels  
113 would kill cells or stop their growth while lower concentrations would not have a  
114 stimulatory effect (42). To determine the concentration of CIP that induces the highest  
115 increase in mutagenesis, we treated exponentially growing cultures of *E. coli* strain IBDS1  
116 (43) with different concentrations of CIP ranging from 0.25 to 4 times the MIC for 8 hours.  
117 We then determined mutation rates using two independent selective markers. Cells treated  
118 with 8 ng/ml of CIP (which correspond to  $\frac{1}{2}$  of the MIC) showed the highest increase on  
119 the rate of mutations conferring resistance to rifampicin (Rif-R; 24-fold increase) and  
120 tetracycline (Tet-R; 2.5-fold increase) (**Supplementary figure 1**). Higher concentrations of  
121 CIP barely produced any increase in mutagenesis. This probably occurred because these  
122 concentrations hampered growth of most treated cells (**Supplementary figure 2**),

123 drastically reducing effective population size and hence limiting evolvability (44). We  
124 decided to use 8 ng/ml of CIP hereafter to maximize antibiotic-induced mutagenesis.

#### 125 *NAC reduces ciprofloxacin-induced intracellular ROS*

126 We then measured the levels of ROS caused by treatment with CIP and tested if NAC  
127 was able to reduce CIP-generated ROS. To this end we used 2',7'-Dichlorofluorescein  
128 diacetate (H<sub>2</sub>DCFDA), a ROS sensitive dye that emits fluorescence when it is oxidized  
129 intracellularly (45). H<sub>2</sub>DCFDA has been previously shown to be an extremely sensitive  
130 probe for the detection of ROS caused by fluoroquinolones, detecting with great sensitivity  
131 H<sub>2</sub>O<sub>2</sub>, ROO· and ONOO<sup>-</sup> (45). As expected, CIP consistently showed increased fluorescence  
132 levels over those produced by antibiotic-mediated autofluorescence (46), indicating a  
133 massive increase of ROS levels compared to untreated cells (**Figure 1** and **Supplementary**  
134 **figure 3a**). Most important, the induction of ROS was reverted to nearly basal levels when  
135 CIP treatment was combined with NAC at 0.5%. This result suggests that NAC, at a  
136 physiologically attainable concentration (47), might be able to reduce DNA damage by  
137 reducing the levels of ROS upon CIP exposure.

#### 138 *NAC reduces CIP-mediated induction of the SOS response*

139 We then analyzed the effect of CIP and NAC in SOS induction. To this end, we used  
140 the strain IBDS1 pRecA::*gfp* that harbours the transcriptional fusion *RecA*::*gfp* contained in  
141 a low copy number plasmid (48, 49). As expected, CIP strongly induced the SOS response  
142 approximately 14-fold compared to untreated controls (Tukey multiple comparisons after  
143 significant ANOVA, P>0.001; **Figure 2a**).

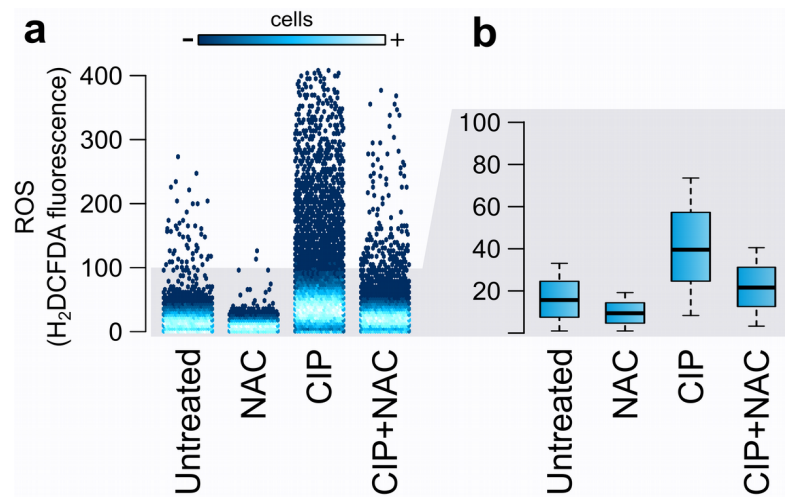

144 **Figure 1. NAC reduces ciprofloxacin-induced intracellular ROS.** ROS were assessed by  
145 individually capturing the fluorescence of H<sub>2</sub>DCFDA in 30,000 cells by flow cytometry after 8  
146 hours of treatment with either 8 ng/ml of CIP, 0.5% NAC or both agents in combination. An  
147 untreated control is shown as a reference. a) The dot plot shows the distribution of fluorescence  
148 signal in the treated populations. At least 99% of the events recorded are shown. The color  
149 scale displays the density of events at every fluorescence level. b) To allow better comparison,  
150 the data is depicted as boxplots, in which the horizontal line represents the median value, the  
151 depth of the box represents the interquartile range (50% of the population), and the whiskers  
152 extend to 0.5 times the interquartile range. Note that shaded areas in both panels represent the  
153 same data.

154 Following the hypothesis that antioxidant compounds can be effective inhibitors of SOS  
155 induction (50), we tested the effect of different NAC concentrations on CIP-mediated SOS  
156 induction. NAC inhibited SOS induction caused by CIP at all concentrations (Tukey  
157 multiple comparisons after significant ANOVA,  $P > 0.001$ ; **Figure 2a**), with an IC<sub>50</sub> of 0.5%  
158 (**Figure 2c**). Again, this concentration is within the range of attainable physiological values  
159 after inhaled administration (47), strongly suggesting that inhibition of the SOS response  
160 by NAC could be a feasible therapeutic approach. Importantly, NAC did not reduce CIP



161 bactericidal activity, as stated by MIC results (**Supplementary Table 1**), growth curves  
162 (**Figure 2b**) and a checkerboard assay (**Figure 2d**). On the contrary, NAC alone inhibited  
163 bacterial growth without inducing the SOS response (Tukey multiple comparisons after  
164 significant ANOVA,  $P=0.0003$ ). This result is in line with previous studies that reported  
165 NAC antibacterial properties against a range of bacterial pathogens (37, 40, 41).  
166 Additionally, we verified that the differences in the final optical density observed upon  
167 different treatments do not directly influence the measurement of SOS induction using GFP  
168 fluorescence (**Supplementary figure 4**).

169 SOS induction leads to the overexpression of *sulA* (*sfiA*), whose product inhibits FtsZ  
170 ring formation and hence cell division (51). The phenotypic consequence of cell division  
171 inhibition is filamentation, which offers an additional SOS-dependent measurable  
172 phenotype. We assessed whether 0.5% NAC was able to inhibit CIP-mediated cell  
173 filamentation by both flow cytometry and direct observation of Gram-stained cultures.  
174 **Figure 3** shows that, as expected, CIP treatment produces a vast increase in the fraction of  
175 the population with filamented cells compared with untreated cultures (33% versus 0.3%  
176 of filamented cells). Remarkably, administration of 0.5% NAC together with CIP, prevented  
177 filamentation in a large fraction of cells (14% versus 33%, for CIP+NAC versus CIP alone).  
178 We qualitatively confirmed these results by microscopy observation of Gram-stained cells  
179 (**Figure 3b**).

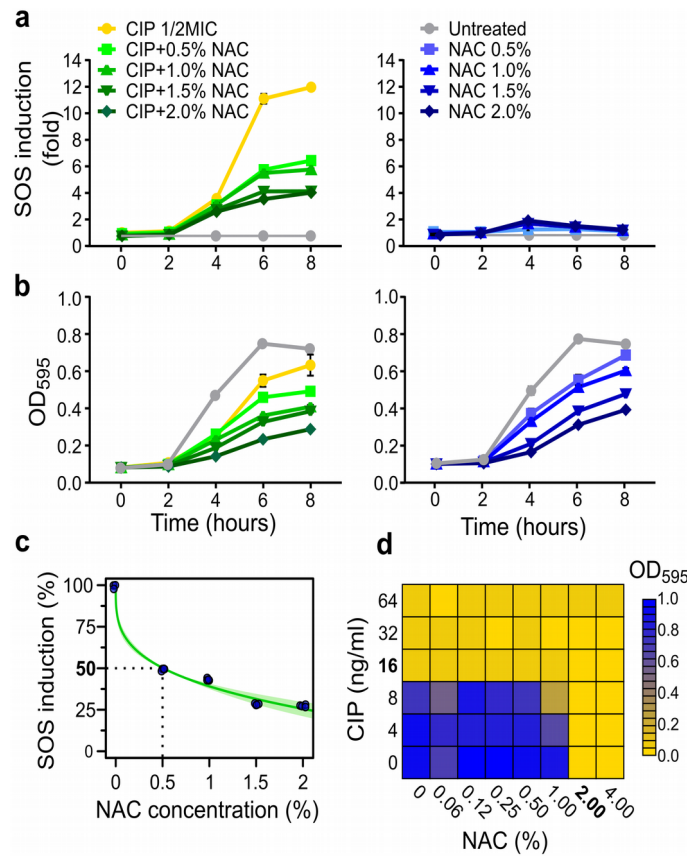

180 **Figure 2. NAC reduces ciprofloxacin-induced SOS response.** Bacterial growth and SOS  
 181 induction were monitored during treatment with varying concentrations of CIP alone or in  
 182 combination with NAC (left panels), or NAC alone (right panels). Samples were taken at  
 183 indicated time points and SOS induction (**a**) and absorbance (**b**) were quantified. Error bars  
 184 represent standard deviation and are not shown when smaller than data points. (**c**) CIP-  
 185 mediated SOS induction at 8h was assessed in combinations with a range of NAC  
 186 concentrations giving rise to a dose-response curve. Experimental data was fitted to the  
 187 following formula  $SOS = a * NAC^b$  by a non-linear model (nls function in R,  $R^2 = 0.988$ ). The  
 188 concentration of NAC that inhibits 50% of SOS response ( $IC_{50}$ ) was 0.5%. Green shaded area  
 189 represents 95% confidence interval of the fit. (**d**) Potential interactions of CIP with NAC were  
 190 determined by the checkerboard method. MIC concentrations for each compound alone are  
 191 shown in bold typeface. No synergistic or antagonistic effect was found.

192 In summary, these results demonstrate that NAC does not decrease bacterial  
193 susceptibility to CIP. It does, however, significantly reduce up to a 75% CIP-mediated  
194 induction of *recA* transcription and cell filamentation, hallmarks of SOS induction.

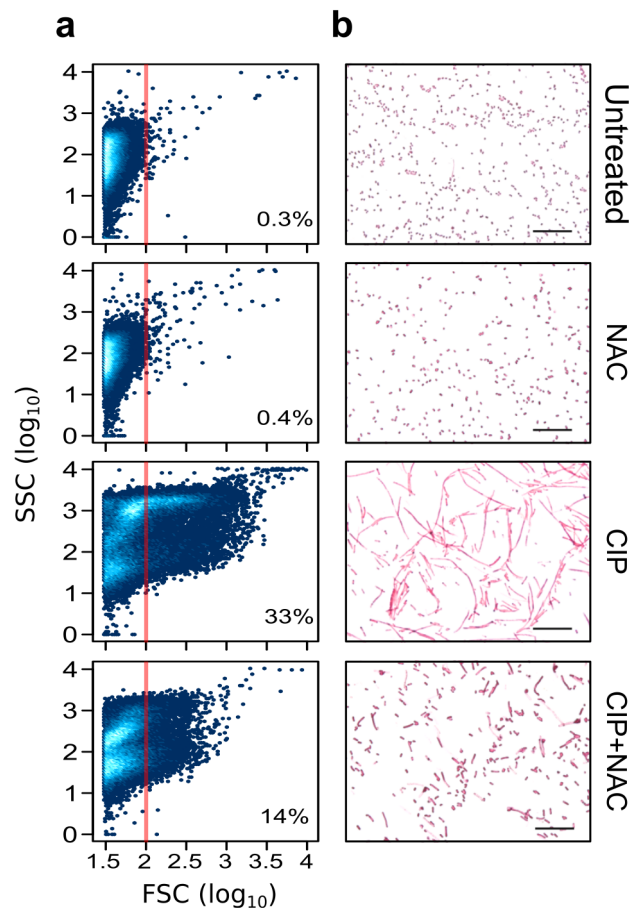

195 **Figure 3. NAC reduces CIP-induced filamentation.** (a) The fraction of filamented cells after  
196 the stated treatments is shown by means of flow cytometric analysis of 30,000 cells (SSC; side  
197 scatter FSC; forward scatter; proportional to cell size). The percentage on every graph  
198 represents the filamented fraction of the population ( $\log_{10}(\text{FSC}) > 2$ ; red vertical line). (b)  
199 Representative microscopy fields of Gram-stained cells. Scale bars is 20  $\mu\text{m}$ .

200 *NAC inhibits SOS response in a ROS-dependent manner*

201       Although the above results compellingly suggest that the reduction of CIP-induced  
202 ROS underlie SOS inhibition by NAC, we cannot rule out other possibilities. NAC could  
203 potentially perturb the activity of the SOS regulatory machinery, for example inhibiting  
204 RecA-ssDNA nucleation or LexA self-cleavage. If that were the case, we expect that NAC  
205 would reduce SOS induction also when DNA damage is independent of ROS. To test this  
206 possibility, we used the *E. coli* strain SMR14354 (52), whose chromosome carries a unique  
207 cutting site for the restriction enzyme I-SceI. In the presence of 0.1% L-arabinose (Ara), I-  
208 SceI is produced, generating DSB and consequently inducing SOS response (**Figure 4a**).  
209 Using flow cytometry and H<sub>2</sub>DCFDA we first verified that generation of DSB by I-SceI does  
210 not increase ROS levels as a side effect (**Figure 4b** and **Supplementary figure 3c**). We  
211 then measured SOS induction at different time-points after DSB induction. Our results  
212 demonstrate that the addition of NAC causes no measurable inhibition of the SOS response  
213 (Two tailed Student's *t* test,  $t=0.64$ ,  $df=4$ ,  $P=0.56$  for Ara vs Ara+NAC after eight hours of  
214 treatment), indicating that NAC inhibition of the SOS response is ROS-dependent (**Figure**  
215 **4c**). Although the experimental conditions used here have been shown to cause at least a  
216 single DSB in 90% of the cells (and more than one in 50% of cells) (52), induction of the  
217 SOS response is lower than that caused by 8 ng/ml of CIP (~6 versus ~14 fold). An  
218 alternative explanation for our results could be that at lower SOS inductions, NAC is unable  
219 to decrease SOS induction. To discard this possibility, and to match the level of induction  
220 caused by I-SceI mediated-DSB, we tested the effect of NAC in cultures treated with lower  
221 CIP concentrations. Our results show that NAC is able to reduce CIP-induced SOS response  
222 in all cases (**Supplementary figure 5**).

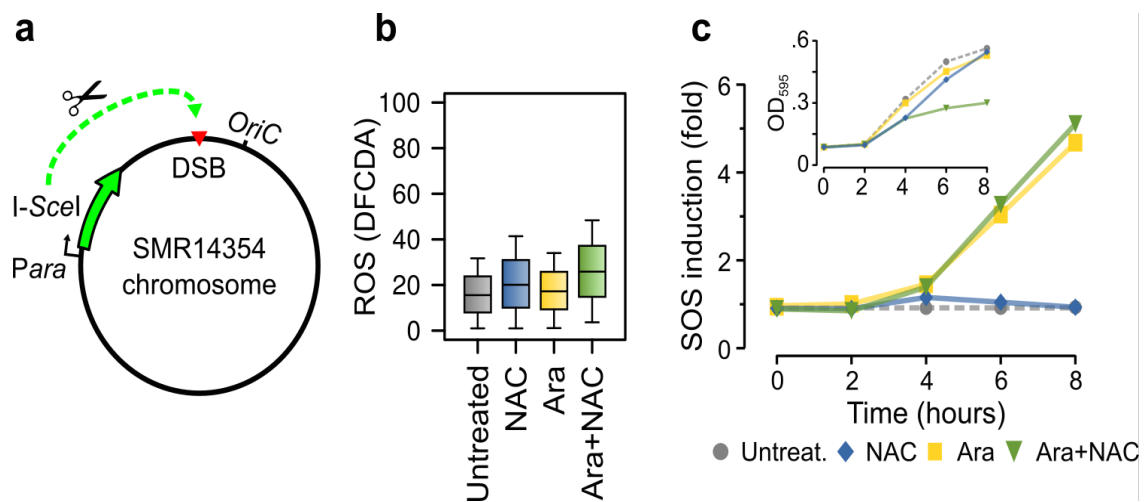

223 **Figure 4. Artificially generated double-strand breaks induce the SOS response but do**  
 224 **not generate ROS.** a) Schematic diagram of the experimental setting. To generate in vivo  
 225 DSB, the strain SMR14354 carries a unique cutting site (red triangle) close to OriC of the  
 226 restriction enzyme I-SceI (scissor), whose expression is induced by L-arabinose (Ara). b) The  
 227 addition of 0.1% L-arabinose generates DSB that concomitantly induce the activation of the  
 228 SOS response (yellow curves), measured here by means of an *PrecA::gfp* transcriptional fusion.  
 229 The addition of NAC alone (blue) or in combination with Ara (yellow) does not alter SOS  
 230 induction. Error bars (sd) smaller than data points are not shown for the sake of clarity. Inset  
 231 graph represents optical density ( $OD_{595}$ ) under the same conditions. c) ROS levels detected by  
 232 the use of the fluorescent  $H_2DCFDA$  probe and flow cytometry show no significant increase after  
 233 the induction of DSB for eight hours.

234 *NAC reduces the SOS-mediated mutagenesis promoted by CIP*

235 The quinolone-mediated increase in mutagenesis has been attributed to the activity  
 236 of TLS DNA-polymerases, whose transcription is induced as part of the SOS response (9,  
 237 53). However, our results and previous studies strongly suggest that high levels of ROS are  
 238 also mutagenic (17–19). To gain knowledge on the contribution of each of these two  
 239 mechanisms we used the strain IBDS1 and its TLS<sup>-</sup> derivative which lacks the three TLS  
 240 error-prone DNA-polymerases (43). We verified that the TLS<sup>-</sup> strain showed similar SOS  
 241 induction and ROS production levels to the wild-type strain when treated by CIP and NAC  
 242 alone or in combination (**Supplementary figures 3 and 6**). Mutation rates of treated

243 cultures showed that treatment with CIP induced mutagenesis in both WT and TLS<sup>-</sup> strain,  
244 although at lower levels in the TLS<sup>-</sup> strain (**Figure 5**). This result indicates that a fraction  
245 of CIP-mediated mutagenesis is not dependent on SOS TLS-polymerases. The combined  
246 treatment with CIP and NAC decreased up to 40% CIP-mediated mutagenesis in the wild-  
247 type strain for both Rif-R and Tet-R selective markers (**Fig. 5a**). This highlights the  
248 importance of ROS as a major contributor to CIP-induced mutagenesis. On the contrary,  
249 NAC was unable to alter CIP-induced mutagenesis in the TLS<sup>-</sup> strain, indicating that TLS-  
250 independent mutagenesis is also ROS-independent (**Fig. 5b**).

251 Together, these results suggest that treatment in wild-type *E. coli* TLS polymerases  
252 act synergistically with ROS in a highly intertwined mutagenesis pathway. Accordingly,  
253 reduction of ROS by NAC completely abolishes SOS-mediated mutagenesis in CIP-treated  
254 bacteria.

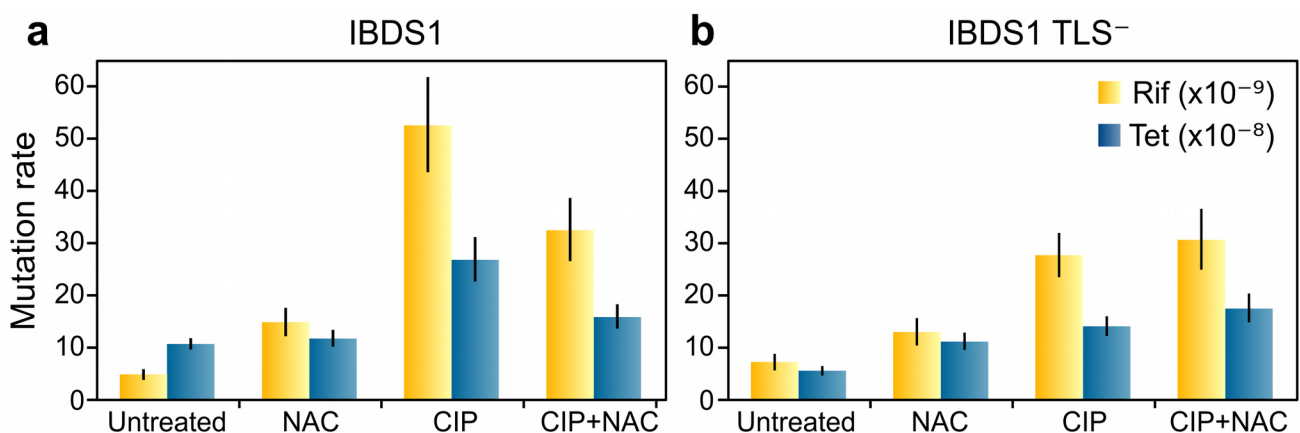

255 **Figure 5. NAC reduces CIP-induced mutagenesis in the wild-type but not in its TLS<sup>-</sup>**  
256 **derivative.** Wild-type (a) and TLS<sup>-</sup> cells (b) were treated with 8 ng/ml of CIP and 0.5% of  
257 NAC alone or in combination. After 20 hours of recovery in antibiotic-free medium, mutation  
258 rates (mutations per site per generation) were calculated using rifampicin (yellow bars) or  
259 tetracycline (blue bars) as selective markers. Differences are statistically significant when error  
260 bars (95% CI) do not overlap.

## 261 Discussion

262 Fluoroquinolones such as CIP provoke the blockage of DNA gyrase on DNA causing  
263 the stalling of replication forks, which produces DSB and leads to cell death (54). DSB are  
264 processed to single strand DNA which activates the SOS response causing the upregulation  
265 of the SOS genes, including the error-prone TLS DNA polymerases (8, 9). Because TLS DNA  
266 replication is mutagenic (9, 53), fluoroquinolones promote mutagenesis by directly  
267 inducing DNA damage and, as a result, the SOS-controlled TLS. Additionally, bactericidal  
268 antibiotics such as fluoroquinolones increase the intracellular levels of ROS, causing cell  
269 death (12, 13). Moreover, high levels of ROS, as DNA-damaging agents, can additionally  
270 induce the SOS response and cause mutagenesis (14, 18, 22).

271 Here, we showed that the decrease of ROS caused by the treatment with the  
272 antioxidant NAC attenuates the induction of the SOS response. However, the magnitude of  
273 the effect observed in this study (i.e. a reduction of up to 75% of SOS induction by NAC),  
274 suggests that ROS are major contributors to DNA-damage and the subsequent activation of  
275 SOS in fluoroquinolone-treated bacteria.

276 This idea is further supported by our mutagenesis results in which a significant  
277 reduction, but not abolition, of CIP-induced mutagenesis was observed upon NAC  
278 treatment in the wild-type strain. Most important, NAC treatment reduced wild-type  
279 mutagenesis to similar levels to those seen in the TLS<sup>-</sup> strain, suggesting that the residual  
280 CIP-induced mutagenesis is independent of TLS repair. Consistent with this view, we  
281 observed an increase in mutagenesis in the TLS<sup>-</sup> strain when submitted to CIP treatment.  
282 This result agrees with recent work in which an increased frequency of indels was found  
283 upon CIP treatment in a TLS<sup>-</sup> strain (55). Together, these results support the existence of a  
284 TLS-independent mutagenic pathway. Pomerantz et al. suggested that Pol I can be highly  
285 error-prone at RecA-mediated D-loops produced by DSB repair (56). Hence, it is likely that

286 CIP, by generating DSB, can fuel the creation of these RecA-mediated D-loops and the  
287 subsequent Pol I mutagenesis. This mechanism is expected to be ROS-independent and  
288 could explain the TLS-independent mutagenesis observed in our study. Further  
289 experimentation will be needed in order to contrast this hypothesis.

290 As a clinical application of our results, we propose that NAC could be used as a  
291 promising adjuvant in CIP treatment, and possibly with other quinolones. NAC is a  
292 clinically safe, FDA-approved drug widely used for the treatment of numerous disorders  
293 (35). We have shown that physiologically attainable concentrations of NAC inhibited SOS  
294 induction without compromising CIP bactericidal activity. On the contrary, NAC itself has  
295 been shown to present antibacterial properties against *Helicobacter pylori* (40),  
296 *Haemophilus influenzae* (37), *Stenotrophomonas maltophilia*, *Burkholderia cepacia* (39) and  
297 *Pseudomonas aeruginosa* biofilms (41). From the clinical point of view, inhibition of SOS  
298 induction could provide several important benefits besides reducing mutagenesis. For  
299 instance, SOS-regulated genes control pathogenic processes such as persistence, tolerance,  
300 infection, and expression of toxins or virulence factors (57–59). Additionally, it is well  
301 known that bacterial filamentation is a SOS controlled process crucial for the development  
302 of some bacterial infections, such as urinary tract infections (60). Therefore, inhibition of  
303 filamentation could be a desirable therapeutic target to improve the prognosis of bacterial  
304 infections. In this regard, our results also show that NAC significantly reduced the fraction  
305 of filamented cells after antibiotic treatment.

306 Taken together, our results suggest that NAC could be used as adjuvant in antibiotic  
307 treatment to inhibit SOS-mutagenesis, reducing the chances for the development of  
308 bacterial resistance and decreasing pathogenesis without compromising antibiotic activity.



## 309 **Methods**

### 310 *Bacterial strains, plasmids and media*

311 Mutation rate experiments, as well as growth curves and flow cytometry assays,  
312 were performed with the *Escherichia coli* MG1655 *attλ::cI* (Ind -)  $\lambda$ pR *tet*  $\Delta$ *ara::FRT*  
313  $\Delta$ *metRE::FRT* strain (IBDS1) and its derivative deficient in error prone polymerases (TLS-).  
314 Mutations that inactivate  $\lambda$  cI (Ind-) repressor gene allow the expression of  $\lambda$ pR*tetA* gene,  
315 which confers resistance to tetracycline (TET) (43). The strain SMR14354 (*E. coli* MG1655  
316  $\Delta$ *araBAD567*  $\Delta$ *attλ::PBADI-SceI* *zfd2509.2::PN25tetR* FRT  $\Delta$ *attTn7::FRT* *catFRT*  
317 *PN25tetOgam-gfp* I-site was used to measure the SOS induction triggered by DSB. This  
318 strain carries a unique I-SceI restriction site close to the chromosomal OriC. I-SceI  
319 expression is regulated by the Ara inducible *Para* promoter (52). The plasmid pSC101-  
320 *PrecA::gfp* (48) was used to monitor SOS induction by fluorescence experiments. Bacterial  
321 strains were grown in LB Broth media, supplemented with ciprofloxacin (CIP; at various  
322 concentrations), kanamycin (KAN; 30  $\mu$ g/ml) or 0.5 % V/V of N-Acetylcysteine (NAC)  
323 when needed.

324 Minimal Inhibitory Concentration (MIC), as well as checkerboard assay were  
325 performed to determine the interaction between ciprofloxacin and NAC, according to  
326 standard susceptibility testing, using LB broth instead of Müller-Hinton. Absorbance at 595  
327 nm was determined using a TECAN Infinite® F200 spectrophotometer after 20h of  
328 incubation at 37°C.

### 329 *Induction of SOS Response*

330 Three independent overnight cultures of the strain containing the plasmid pSC101-  
331 *PrecA::gfp* were diluted 1:100 in 5 ml of LB supplemented with KAN and grown to  
332 exponential phase (OD<sub>600</sub> 0.5-0.6) at 37°C and 200 r.p.m. Subsequently, the cultures were

333 diluted 1:50 in LB+KAN. 2ml aliquots were treated with various concentrations of CIP  
334 (with or without NAC 0.5%) during 8 hours at 37°C and 250 r.p.m. The procedure was  
335 repeated with the strain SMR14354, but adding 0.1% V/V of Ara instead of CIP as SOS  
336 inducer. We verified that higher Ara concentrations do not increase SOS induction,  
337 probably because at 0.1% the concentration of I-SceI is enough to cause DSB in most cells  
338 (52) (**Supplementary figure 7**). Controls without treatment were also included in every  
339 experiment. Absorbance at 595 nm and green fluorescence (485/520 nm) were monitored  
340 using a TECAN Infinite F200 plate reader. SOS induction was obtained by normalizing GFP-  
341 fluorescence by the absorbance of each sample. To determine fold change, the average SOS  
342 induction of three replicas per condition was divided by the average value of untreated  
343 samples.

#### 344 *Flow cytometry*

345 Intracellular ROS levels were determined by the use of the oxidation sensitive probe  
346 2',7'-Dichlorofluorescein diacetate (H<sub>2</sub>DCFDA, Sigma-Aldrich). Overnight cultures of the  
347 strain IBDS1 or its TLS- derivative were diluted 1:100 in 5 ml of LB media containing  
348 H<sub>2</sub>DCFDA 100 µg/ml, and grown to exponential phase (OD<sub>600</sub> 0.5-0.6) at 37°C and 250  
349 r.p.m. Controls without probe were included to monitor autofluorescence. 2 ml aliquots  
350 from 1:50 dilutions from both cultures (with and without H<sub>2</sub>DCFDA) were treated with CIP  
351 8 ng/ml or Ara 0.1%, with or without NAC 0.5%, during 8 hours at 37°C and 250 r.p.m.  
352 Three replicas of each condition were included in the assay. Green fluorescence emitted by  
353 the intracellular oxidation of the dye was determined using a guava easyCyte cytometer  
354 (Millipore). Three replicas of 10,000 events each one, with a concentration of 200-400  
355 cells/µl, were analyzed for each one of the conditions. For estimation of filamentation,  
356 forward scatter (FSC) was analyzed in samples without H<sub>2</sub>DCFDA. Data analysis was  
357 performed using custom scripts in R ([www.R-project.org/](http://www.R-project.org/)).

358 *Microscopy*

359 Cultures were treated with CIP, NAC or both agents exactly as in the mutation rate  
360 experiments. After 8 hours of treatment, a frostis of every sample was prepared as follows:  
361 10 $\mu$ l of culture was spread with a loop on a microscope slide. Samples were fixated by heat,  
362 stained with safranin for 1minute and then washed with distilled water. Slides were  
363 observed under a Olympus BX61 microscope using the 100x objective.

364 *Mutation Rate Assays*

365 Three biological replicates of 1:100 dilutions from overnight cultures were grown in  
366 LB media to exponential phase (OD<sub>600</sub> 0.5-0.6) at 37°C and 200 r.p.m. Subsequently, 2ml  
367 aliquots from 1:50 dilutions were treated with CIP 8 ng/ml, with or without NAC 0.5%  
368 during 8 hours at 37°C and 250 r.p.m. After treatment 1 ml of culture was centrifuged for 6  
369 min at 8,000 r.p.m. Cells were resuspended in fresh LB media and incubated 20 hours at  
370 200 r.p.m to allow resolution of filaments. Appropriate dilutions were plated onto LB-dishes  
371 containing tetracycline (TET; 15  $\mu$ g/ml) or rifampicin (RIF; 100  $\mu$ g/ml) as selective  
372 markers, and LB agar for viable counting. Plates were incubated at 37°C for 24 hours. The  
373 expected number of mutations per culture (m) and 95% confidence intervals were  
374 calculated using the maximum likelihood estimator, applying the *newton.LD.plating* and  
375 *confint.LD.plating* functions that account for differences in plating efficiency implemented  
376 in the package rSalvador (61) for R ([www.R-project.org/](http://www.R-project.org/)). Mutation rates (mutations per  
377 cell per generation) were then calculated by dividing m by the total number of generations,  
378 assumed to be roughly equal to the average final number of cells. Differences are  
379 considered statistically significant when 95% confidence intervals do not overlap.

380 *Data Availability*

381 The datasets generated during and/or analysed during the current study are available from  
382 the corresponding authors on reasonable request.

383 **Author contributions**

384 J.B and J.R-B conceived the study. A.I.R, E.Y.V, R.S.G, J.B, A.R-R and J.R-B designed the  
385 experiments. A.I.R, E.Y.V and C.C performed the experiments. A.I.R and J.R-B analysed the  
386 data. J.B and R.S.G provided reagents and materials. A.I.R, J.B. and J.R-B wrote the  
387 manuscript. All authors discussed the results and implications and commented on the  
388 manuscript at all stages.

389 **Acknowledgements**

390 We thank Juan J. Infante and D. Andrade Moreno for critical reading of this manuscript  
391 and helpful comments. Strains IBDS1 and SMR14354 are kind gifts of Ivan Matic and  
392 Susan M. Rosemberg. J.B. was supported by the Spanish Plan Nacional de I+D+i 2013–  
393 2016 and the Instituto de Salud Carlos III, Subdirección General de Redes y Centros de  
394 Investigación Cooperativa, Ministerio de Economía, Industria y Competitividad, Spanish  
395 Network for Research in Infectious Diseases; grant REIPI RD16/0016/0009, cofinanced by  
396 the European Development Regional Fund “A Way to Achieve Europe” and by Operative  
397 Program IntelligentGrowth 2014–2020; and grants FIS PI17/00159 (ISCIII/FEDER,UE) and  
398 SAF2015-72793-EXP (AEI/FEDER, UE). R.S.G. was supported by Fundação de Amparo à  
399 Pesquisa do Estado de São Paulo, Brazil (FAPESP, grant 2014/15982-6) and Conselho  
400 Nacional de Desenvolvimento Científico e Tecnológico, Brazil (CNPq, grant 407259/2013-  
401 9). E.Y.V was funded by a postdoctoral fellowship from CNPq (grant 236914/2012-0). J.R.-  
402 B. is a recipient of a Juan de la Cierva Fellowship, Ministerio de Economía Industria y  
403 Competitividad (FJCI-2016-30019).

## 404 **Competing Interests**

405 The authors declare that they have no competing interests.

## 406 **References**

- 407 1. Blázquez J, Rodríguez-Beltrán J, Matic I. 2018. Antibiotic-Induced Genetic Variation:  
408 How It Arises and How It Can Be Prevented. *Annu Rev Microbiol* 72:209–230.
- 409 2. Cirz RT, Romesberg FE. 2007. Controlling mutation: intervening in evolution as a  
410 therapeutic strategy. *Crit Rev Biochem Mol Biol* 42:341–354.
- 411 3. Cirz RT, Chin JK, Andes DR, de Crécy-Lagard V, Craig WA, Romesberg FE. 2005.  
412 Inhibition of Mutation and Combating the Evolution of Antibiotic Resistance. *PLoS*  
413 *Biol* 3:e176.
- 414 4. Drlica K, Zhao X. 1997. DNA gyrase, topoisomerase IV, and the 4-quinolones.  
415 *Microbiol Mol Biol Rev* 61:377–392.
- 416 5. Janion C. 2008. Inducible SOS response system of DNA repair and mutagenesis in  
417 *Escherichia coli*. *Int J Biol Sci*.
- 418 6. Courcelle J, Crowley DJ, Hanawalt PC. 1999. Recovery of DNA replication in UV-  
419 irradiated *Escherichia coli* requires both excision repair and RecF protein function. *J*  
420 *Bacteriol* 181:916–922.
- 421 7. Friedberg EC, Roger AS, Wolfram S, Graham CW, Tom E, Richard DW. 2006. DNA  
422 Repair and Mutagenesis, Second Edition. American Society for Microbiology Press.
- 423 8. Fernández De Henestrosa AR, Ogi T, Aoyagi S, Chafin D, Hayes JJ, Ohmori H,  
424 Woodgate R. 2000. Identification of additional genes belonging to the LexA regulon  
425 in *Escherichia coli*. *Mol Microbiol* 35:1560–1572.
- 426 9. Vaisman A, Mcdonald JP, Woodgate R, Editor S, Kuzminov A. 2012. Translesion DNA  
427 Synthesis. *EcoSal Plus* 101:1–38.
- 428 10. López E, Elez M, Matic I, Blázquez J. 2007. Antibiotic-mediated recombination:  
429 Ciprofloxacin stimulates SOS-independent recombination of divergent sequences in  
430 *Escherichia coli*. *Mol Microbiol* 64:83–93.
- 431 11. Dwyer DJ, Collins JJ, Walker GC. 2014. Unraveling the Physiological Complexities of  
432 Antibiotic Lethality. *Annu Rev Pharmacol Toxicol* 1–20.
- 433 12. Dwyer DJ, Kohanski MA, Hayete B, Collins JJ. 2007. Gyrase inhibitors induce an  
434 oxidative damage cellular death pathway in *Escherichia coli*. *Mol Syst Biol* 3:91.
- 435 13. Kohanski MA, Dwyer DJ, Hayete B, Lawrence CA, Collins JJ. 2007. A Common  
436 Mechanism of Cellular Death Induced by Bactericidal Antibiotics. *Cell* 130:797–810.

- 437 14. Foti JJ, Devadoss B, Winkler JA, Collins JJ, Walker GC. 2012. Oxidation of the  
438 guanine nucleotide pool underlies cell death by bactericidal antibiotics. *Science*  
439 336:315–9.
- 440 15. Liu Y, Imlay J a. 2013. Cell death from antibiotics without the involvement of reactive  
441 oxygen species. *Science* 339:1210–3.
- 442 16. Keren I, Wu Y, Inocencio J, Mulcahy LR, Lewis K. 2013. Killing by Bactericidal  
443 Antibiotics Does Not Depend on Reactive Oxygen Species. *Science* (80- ) 339:1213–  
444 1216.
- 445 17. Keyer K, Imlay JA. 1996. Superoxide accelerates DNA damage by elevating free-iron  
446 levels. *Proc Natl Acad Sci U S A* 93:13635–40.
- 447 18. Linn S, Imlay JA. 1987. Toxicity, mutagenesis and stress responses induced in  
448 *Escherichia coli* by hydrogen peroxide. *J Cell Sci Suppl* 6:289–301.
- 449 19. Imlay JA. 2008. Cellular defenses against superoxide and hydrogen peroxide. *Annu*  
450 *Rev Biochem* 77:755–776.
- 451 20. Kohanski MA, DePristo MA, Collins JJ. 2010. Sublethal Antibiotic Treatment Leads to  
452 Multidrug Resistance via Radical-Induced Mutagenesis. *Mol Cell* 37:311–320.
- 453 21. Goerlich O, Quillardet P, Hofnung M. 1989. Induction of the SOS response by  
454 hydrogen peroxide in various *Escherichia coli* mutants with altered protection against  
455 oxidative DNA damage. *J Bacteriol* 171:6141–6147.
- 456 22. Konola JT, Sargent KE, Gow JB. 2000. Efficient repair of hydrogen peroxide-induced  
457 DNA damage by *Escherichia coli* requires SOS induction of RecA and RuvA proteins.  
458 *Mutat Res* 459:187–194.
- 459 23. Carlsson J, Carpenter VS. 1980. The *recA+* gene product is more important than  
460 catalase and superoxide dismutase in protecting *Escherichia coli* against hydrogen  
461 peroxide toxicity. *J Bacteriol* 142:319–321.
- 462 24. McBride TJ, Preston BD, Loeb LA. 1991. Mutagenic spectrum resulting from DNA  
463 damage by oxygen radicals. *Biochemistry* 30:207–213.
- 464 25. Kottur J, Nair DT. 2016. Reactive Oxygen Species Play an Important Role in the  
465 Bactericidal Activity of Quinolone Antibiotics. *Angew Chemie Int Ed* 55:2397–2400.
- 466 26. Baquero F, Coque TM, de la Cruz F. 2011. Ecology and evolution as targets: the need  
467 for novel eco-evo drugs and strategies to fight antibiotic resistance. *Antimicrob*  
468 *Agents Chemother* 55:3649–60.
- 469 27. Culyba MJ, Mo CY, Kohli RM. 2015. Targets for Combating the Evolution of Acquired  
470 Antibiotic Resistance. *Biochemistry* 54:3573–3582.

- 471 28. Alam MK, Alhazmi A, Decoteau JF, Luo Y, Geyer CR. 2016. RecA Inhibitors  
472 Potentiate Antibiotic Activity and Block Evolution of Antibiotic Resistance. *Cell Chem*  
473 *Biol* 23:381–391.
- 474 29. Nautiyal A, Patil KN, Muniyappa K. 2014. Suramin is a potent and selective inhibitor  
475 of *Mycobacterium tuberculosis* RecA protein and the SOS response: RecA as a  
476 potential target for antibacterial drug discovery. *J Antimicrob Chemother* 69:1834–  
477 1843.
- 478 30. Peterson EJ, Janzen WP, Kireev D, Singleton SF. 2012. High-throughput screening  
479 for RecA inhibitors using a transcriber adenosine 5'-O-diphosphate assay. *Assay*  
480 *Drug Dev Technol* 10:260–8.
- 481 31. Mo CY, Manning SA, Roggiani M, Culyba MJ, Samuels AN, Sniegowski PD, Goulian  
482 M, Kohli RM. 2016. Systematically Altering Bacterial SOS Activity under Stress  
483 Reveals Therapeutic Strategies for Potentiating Antibiotics. *mSphere* 1:e00163-16.
- 484 32. Recacha E, Machuca J, Díaz de Alba P, Ramos-Güelfo M, Docobo-Pérez F, Rodríguez-  
485 Beltrán J, Blázquez J, Pascual A, Rodríguez-Martínez JM. 2017. Quinolone Resistance  
486 Reversion by Targeting the SOS Response. *MBio* 8:e00971-17.
- 487 33. Mo CY, Culyba MJ, Selwood T, Kubiak JM, Hostetler ZM, Jurewicz AJ, Keller PM,  
488 Pope AJ, Quinn A, Schneck JL, Widdowson KL, Kohli RM. 2017. Inhibitors of LexA  
489 autoproteolysis and the bacterial SOS response discovered by an academic-industry  
490 partnership. *ACS Infect Dis* acsinfecdis.7b00122.
- 491 34. Samuni Y, Goldstein S, Dean OM, Berk M. 2013. The chemistry and biological  
492 activities of N-acetylcysteine. *Biochem Biophys* 1830:4117–4129.
- 493 35. Elbini Dhouib I, Jallouli M, Annabi A, Gharbi N, Elfazaa S, Lasram MM. 2016. A  
494 minireview on N-acetylcysteine: An old drug with new approaches. *Life Sci*.
- 495 36. Rodríguez-Beltrán J, Cabot G, Valencia EY, Costas C, Bou G, Oliver A, Blázquez J.  
496 2015. N -Acetylcysteine Selectively Antagonizes the Activity of Imipenem in  
497 *Pseudomonas aeruginosa* by an OprD-Mediated Mechanism. *Antimicrob Agents*  
498 *Chemother* 59:3246–3251.
- 499 37. Landini G, Di Maggio T, Sergio F, Docquier JD, Rossolini GM, Pallecchi L. 2016.  
500 Effect of high N-acetylcysteine concentrations on antibiotic activity against a large  
501 collection of respiratory pathogens. *Antimicrob Agents Chemother* 60:7513–7517.
- 502 38. Ak T, Gülçin İ. 2008. Antioxidant and radical scavenging properties of curcumin.  
503 *Chem Biol Interact* 174:27–37.
- 504 39. Pollini S, Di Pilato V, Landini G, Di Maggio T, Cannatelli A, Sottotetti S, Cariani L,  
505 Aliberti S, Blasi F, Sergio F, Rossolini GM, Pallecchi L. 2018. In vitro activity of N-  
506 acetylcysteine against *Stenotrophomonas maltophilia* and *Burkholderia cepacia*  
507 complex grown in planktonic phase and biofilm. *PLoS One* 13:e0203941.

- 508 40. Jang S, Bak E-J, Cha J-H. 2017. N-acetylcysteine prevents the development of  
509 gastritis induced by *Helicobacter pylori* infection. *J Microbiol* 55:396–402.
- 510 41. Zhao T, Liu Y. 2010. N-acetylcysteine inhibit biofilms produced by *Pseudomonas*  
511 *aeruginosa*. *BMC Microbiol* 10:140.
- 512 42. Blázquez J, Couce A, Rodríguez-Beltrán J, Rodríguez-Rojas A. 2012. Antimicrobials as  
513 promoters of genetic variation. *Curr Opin Microbiol* 15:561–9.
- 514 43. Bjedov I, Dasgupta CN, Slade D, Le Blastier S, Selva M, Matic I. 2007. Involvement of  
515 *Escherichia coli* DNA polymerase IV in tolerance of cytotoxic alkylating DNA lesions  
516 in vivo. *Genetics* 176:1431–40.
- 517 44. Frenoy A, Bonhoeffer S. 2018. Death and population dynamics affect mutation rate  
518 estimates and evolvability under stress in bacteria. *PLOS Biol* 16:e2005056.
- 519 45. Dwyer DJ, Belenky PA, Yang JH, MacDonald IC, Martell JD, Takahashi N, Chan CTY,  
520 Lobritz MA, Braff D, Schwarz EG, Ye JD, Pati M, Vercruyse M, Ralifo PS, Allison KR,  
521 Khalil AS, Ting AY, Walker GC, Collins JJ. 2014. Antibiotics induce redox-related  
522 physiological alterations as part of their lethality. *Proc Natl Acad Sci U S A*  
523 111:E2100-9.
- 524 46. Renggli S, Keck W, Jenal U, Ritz D. 2013. Role of Autofluorescence in Flow  
525 Cytometric Analysis of *Escherichia coli* Treated with Bactericidal Antibiotics. *J*  
526 *Bacteriol* 195:4067–4073.
- 527 47. Szkudlarek U, Zdziechowski A, Witkowski K, Kasielski M, Luczyńska M, Luczyński R,  
528 Sarniak A, Nowak D. 2004. Effect of inhaled N-acetylcysteine on hydrogen peroxide  
529 exhalation in healthy subjects. *Pulm Pharmacol Ther* 17:155–162.
- 530 48. Ronen M, Rosenberg R, Shraiman BI, Alon U. 2002. Assigning numbers to the  
531 arrows: parameterizing a gene regulation network by using accurate expression  
532 kinetics. *Proc Natl Acad Sci U S A* 99:10555–60.
- 533 49. Thi T Do, López E, Rodríguez-Rojas A, Rodríguez-Beltrán J, Couce A, Guelfo JR,  
534 Castañeda-García A, Blázquez J. 2011. Effect of *recA* inactivation on mutagenesis of  
535 *Escherichia coli* exposed to sublethal concentrations of antimicrobials. *J Antimicrob*  
536 *Chemother* 66:531–8.
- 537 50. Peng Q, Zhou S, Yao F, Hou B, Huang Y, Hua D, Zheng Y, Qian Y. 2011. Baicalein  
538 suppresses the SOS response system of *Staphylococcus aureus* induced by  
539 ciprofloxacin. *Cell Physiol Biochem* 28:1045–1050.
- 540 51. Huisman O, D’Ari R, Gottesman S. 1984. Cell-division control in *Escherichia coli*:  
541 specific induction of the SOS function SfiA protein is sufficient to block septation.  
542 *Proc Natl Acad Sci U S A* 81:4490–4.
- 543 52. Shee C, Cox BD, Gu F, Luengas EM, Joshi MC, Chiu LY, Magnan D, Halliday JA,  
544 Frisch RL, Gibson JL, Nehring RB ernd, Do HG, Hernandez M, Li L, Herman C,



- 545 Hastings PJ, Bates D, Harris RS, Miller KM, Rosenberg SM. 2013. Engineered proteins  
546 detect spontaneous DNA breakage in human and bacterial cells. *Elife* 2:e01222.
- 547 53. Goodman MF. 2002. Error-prone repair DNA polymerases in prokaryotes and  
548 eukaryotes. *Annu Rev Biochem* 71:17–50.
- 549 54. Drlica K, Malik M, Kerns RJ, Zhao X. 2008. Quinolone-mediated bacterial death.  
550 *Antimicrob Agents Chemother*.
- 551 55. Song LY, Goff M, Davidian C, Mao Z, London M, Lam K, Yung M, Miller JH. 2016.  
552 Mutational Consequences of Ciprofloxacin in *Escherichia coli*. *Antimicrob Agents*  
553 *Chemother* 60:6165–72.
- 554 56. Pomerantz RT, Goodman MF, O'Donnell ME. 2013. DNA polymerases are error-prone  
555 at RecA-mediated recombination intermediates. *Cell Cycle* 12:2558–2563.
- 556 57. Bernier SP, Lebeaux D, DeFrancesco AS, Valomon A, Soubigou G, Coppée JY, Ghigo  
557 JM, Beloin C. 2013. Starvation, Together with the SOS Response, Mediates High  
558 Biofilm-Specific Tolerance to the Fluoroquinolone Ofloxacin. *PLoS Genet*  
559 9:e1003144.
- 560 58. Dörr T, Lewis K, Vulić M, Dörr T, Lewis K, Vulić M, Dörr T, Lewis K, Vulic M. 2009.  
561 SOS response induces persistence to fluoroquinolones in *Escherichia coli*. *PLoS Genet*  
562 5:e1000760.
- 563 59. Huerta-Uribe A, Marjenberg ZR, Yamaguchi N, Fitzgerald S, Connolly JPR, Carpena  
564 N, Uvell H, Douce G, Elofsson M, Byron O, Marquez R, Gally DL, Roe AJ. 2016.  
565 Identification and characterization of novel compounds blocking Shiga toxin  
566 expression in *Escherichia coli* O157:H7. *Front Microbiol* 7:1930.
- 567 60. Li B, Smith P, Horvath DJ, Romesberg FE, Justice SS. 2010. SOS regulatory elements  
568 are essential for UPEC pathogenesis. *Microbes Infect* 12:662–668.
- 569 61. Zheng Q. 2017. rSalvador: An R Package for the Fluctuation Experiment. *G3*  
570 (Bethesda) 7:3849–3856.
